# Supplementary material for: Galleria mellonella as a model system to study virulence potential of mucormycetes and evaluation of antifungal treatment
Source: PubMed Central journal article supplement — Med Mycol. 2018 Jun 19;57(3):351–62. doi: 10.1093/mmy/myy042 (PMC6398984; doi:10.1093/mmy/myy042), 2018-06-19
Supplement: myy042_supplement_tables.pdf [file myy042_supplement_tables.pdf]

**Table S1: Mucorales strains used in this study.**

| <b>species</b>           | <b>internal ID</b> | <b>CBS number</b> | <b>origin of isolation</b>               |
|--------------------------|--------------------|-------------------|------------------------------------------|
| <i>L. corymbifera</i>    | L1                 | CBS 429.75        | environment, soil                        |
|                          | AS15               |                   | patient isolate                          |
|                          | AS17               |                   | patient isolate,                         |
|                          | AS30               |                   | patient isolate,                         |
|                          | AS103              |                   | patient isolate, tracheal secrete        |
| <i>L. ramosa</i>         | LC4                | CBS 109940        | patient isolate, skin                    |
|                          | L6                 | CBS 582.65        | environment, seed                        |
|                          | LR5                | CBS 101.55        | patient isolate, cornea                  |
|                          | AS35               |                   | patient isolate                          |
|                          | AS64               |                   | patient isolate, sputum                  |
|                          | 33-12              |                   | patient isolate, bronchial secretion     |
| <i>R. microsporus</i>    | F50                | CBS 102277        | patient isolate                          |
|                          | RM1                |                   | patient isolate, rhinocerebral infection |
|                          | AS37               |                   | patient isolate                          |
|                          | AS73               |                   | patient isolate                          |
|                          | 31-10              |                   | patient isolate, tissue sample           |
| <i>R. arrhizus</i>       | 44-12              |                   | patient isolate, tracheal secrete        |
|                          | R6                 |                   | environment                              |
|                          | 31-10              |                   | environment                              |
|                          | R2                 | CBS 126971        | patient isolate                          |
| <i>Rh. pusillus</i>      | Rh1                |                   | environment                              |
|                          | F12                |                   | patient isolate, liver                   |
|                          | 2-11               |                   | patient isolate, sputum                  |
|                          | RP3                | CBS 219.31        | isolated from pig, kidney                |
| <i>M. circinelloides</i> | S44                |                   | patient isolate                          |
|                          | 39-10              |                   | patient isolate, skin swab               |
|                          | AS84               |                   | patient isolate                          |
|                          | MC6                | CBS 394.68        | isolated from beef meat                  |

**Table S2: *Mucorales* member exhibited different spore size and form.**

| <b><i>Mucorales</i> members</b> | <b>Spore diameter (<math>\mu\text{m}</math>)</b> | <b>spore form</b>     |
|---------------------------------|--------------------------------------------------|-----------------------|
| <i>L. corymbifera</i> (n=5)     | 2.8-4.2 $\mu\text{m}$                            | spherical/ellipsoidal |
| <i>L. ramosa</i> (n=3)          | 2.5-4.1 $\mu\text{m}$                            | spherical/ellipsoidal |
| <i>Rh. pusillus</i> (n=2)       | 2.8-4.2 $\mu\text{m}$                            | spherical             |
| <i>R. arrhizus</i> (n=2)        | 5.5-7.8 $\mu\text{m}$                            | ellipsoidal           |
| <i>R. microsporus</i> (n=4)     | 5.8-9.1 $\mu\text{m}$                            | ellipsoidal           |
| <i>M. circinelloides</i> (n=3)  | 4.5-7.2 $\mu\text{m}$                            | ellipsoidal           |

**Table S3: Species-specific antifungal susceptibility patterns against L-AMB, POS, ISA and NYT-IL.** MICs were determined after 24h at 37°C according to EUCAST guidelines<sup>47</sup>.

| species                        | L-AMB      |        | POS     |        | ISA     |        | NYT   |        | NYT-IL |        |
|--------------------------------|------------|--------|---------|--------|---------|--------|-------|--------|--------|--------|
|                                | range      | median | range   | Median | range   | median | range | median | range  | median |
| <i>L. corymbifera</i> (n=6)    | 0.25 - 0.5 | 0.5    | 0.5 - 1 | 1      | 1 - 2   | 2      | 8 - 8 | 8      | 1 - 2  | 1      |
| <i>L. ramosa</i> (n=5)         | 0.25 - 0.5 | 0.25   | 1 - 2   | 2      | 4 - 8   | 4      | 6 - 8 | 8      | 2 - 4  | 2      |
| <i>Rh. pusillus</i> (n=4)      | 0.25 - 0.5 | 0.25   | 1 - 2   | 1      | 2 - 4   | 2      | 2 - 2 | 2      | 1 - 2  | 1      |
| <i>R. arrhizus</i> (n=4)       | 0.5 - 0.5  | 0.5    | 1 - 2   | 1      | 0.5 - 1 | 0.5    | 1 - 2 | 2      | 1 - 2  | 1      |
| <i>R. microsporus</i> (n=5)    | 0.25 - 0.5 | 0.5    | 1 - 2   | 2      | 0.5 - 8 | 0.5    | 4 - 8 | 4      | 1 - 8  | 4      |
| <i>M. circinelloides</i> (n=4) | 0.25 - 0.5 | 0.5    | 1 - 4   | 2      | 4 - 8   | 8      | 1 - 2 | 2      | 1 - 2  | 1      |

**Table S4:** Survival rates of larvae infected with mucormycetes and incubated at 30°C. Average survival was calculated out of 60 infected larvae, stev indicates standard deviation.

| samples                  | inoculum        | average survival 24h | stev | average survival 48h | stev | average survival 72h | stev | average survival 96h | stev | average survival 120h | stev | average survival 144h | stev |
|--------------------------|-----------------|----------------------|------|----------------------|------|----------------------|------|----------------------|------|-----------------------|------|-----------------------|------|
| IPS                      |                 | 10.0                 | 0.0  | 10.0                 | 0.0  | 9.9                  | 0.4  | 9.9                  | 0.4  | 9.7                   | 0.5  | 9.4                   | 0.5  |
| untouched                |                 | 10.0                 | 0.0  | 10.0                 | 0.0  | 10.0                 | 0.0  | 9.9                  | 0.4  | 9.8                   | 0.5  | 9.4                   | 0.5  |
| <i>R. microsporus</i>    | 10 <sup>7</sup> | 0.0                  | 0.0  | 0.0                  | 0.0  | 0.0                  | 0.0  | 0.0                  | 0.0  | 0.0                   | 0.0  | 0.0                   | 0.0  |
|                          | 10 <sup>6</sup> | 0.0                  | 0.0  | 0.0                  | 0.0  | 0.0                  | 0.0  | 0.0                  | 0.0  | 0.0                   | 0.0  | 0.0                   | 0.0  |
|                          | 10 <sup>5</sup> | 10.0                 | 0.0  | 8.4                  | 1.7  | 3.2                  | 1.5  | 1.6                  | 1.1  | 0.8                   | 0.4  | 0.8                   | 0.4  |
|                          | 10 <sup>4</sup> | 10.0                 | 0.0  | 9.8                  | 0.5  | 9.0                  | 0.0  | 8.5                  | 1.0  | 7.5                   | 1.7  | 7.0                   | 1.8  |
| <i>R. arrhizus</i>       | 10 <sup>7</sup> | 0.0                  | 0.0  | 0.0                  | 0.0  | 0.0                  | 0.0  | 0.0                  | 0.0  | 0.0                   | 0.0  | 0.0                   | 0.0  |
|                          | 10 <sup>6</sup> | 9.8                  | 0.5  | 5.5                  | 1.9  | 0.0                  | 0.0  | 0.0                  | 0.0  | 0.0                   | 0.0  | 0.0                   | 0.0  |
|                          | 10 <sup>5</sup> | 10.0                 | 0.0  | 5.8                  | 1.0  | 1.0                  | 0.8  | 0.0                  | 0.0  | 0.0                   | 0.0  | 0.0                   | 0.0  |
|                          | 10 <sup>4</sup> | 10.0                 | 0.0  | 9.7                  | 0.6  | 5.7                  | 1.2  | 3.0                  | 1.0  | 2.7                   | 1.5  | 1.7                   | 0.6  |
| <i>Rh. pusillus</i>      | 10 <sup>7</sup> | 8.3                  | 1.2  | 8.3                  | 1.2  | 8.0                  | 1.0  | 7.3                  | 1.5  | 7.3                   | 1.5  | 6.7                   | 1.2  |
|                          | 10 <sup>6</sup> | 9.5                  | 0.7  | 9.0                  | 1.4  | 9.0                  | 1.4  | 9.0                  | 1.4  | 9.0                   | 1.4  | 9.0                   | 1.4  |
|                          | 10 <sup>5</sup> | 10.0                 | 0.0  | 10.0                 | 0.0  | 10.0                 | 0.0  | 9.3                  | 1.0  | 9.3                   | 1.0  | 9.3                   | 1.0  |
|                          | 10 <sup>4</sup> | 9.5                  | 0.6  | 9.5                  | 0.6  | 9.5                  | 0.6  | 9.5                  | 0.6  | 9.5                   | 0.6  | 9.0                   | 0.8  |
| <i>L. corymbifera</i>    | 10 <sup>7</sup> | 7.8                  | 1.5  | 7.3                  | 2.4  | 7.0                  | 2.2  | 6.5                  | 2.1  | 6.5                   | 2.1  | 6.0                   | 1.6  |
|                          | 10 <sup>6</sup> | 10.0                 | 0.0  | 9.5                  | 0.7  | 9.0                  | 0.0  | 9.0                  | 0.0  | 9.0                   | 0.0  | 8.5                   | 0.7  |
|                          | 10 <sup>5</sup> | 9.8                  | 0.5  | 9.8                  | 0.5  | 9.5                  | 0.6  | 9.5                  | 0.6  | 8.3                   | 1.0  | 8.0                   | 0.8  |
|                          | 10 <sup>4</sup> | 10.0                 | 0.0  | 10.0                 | 0.0  | 10.0                 | 0.0  | 10.0                 | 0.0  | 9.5                   | 1.0  | 9.5                   | 1.0  |
| <i>L. ramosa</i>         | 10 <sup>7</sup> | 9.7                  | 0.6  | 9.7                  | 0.6  | 9.3                  | 1.2  | 9.0                  | 1.7  | 8.7                   | 1.5  | 8.0                   | 1.7  |
|                          | 10 <sup>6</sup> | 9.5                  | 0.7  | 9.5                  | 0.7  | 9.5                  | 0.7  | 9.5                  | 0.7  | 9.0                   | 1.4  | 7.5                   | 0.7  |
|                          | 10 <sup>5</sup> | 9.8                  | 0.5  | 9.8                  | 0.5  | 9.0                  | 1.2  | 9.0                  | 1.2  | 8.8                   | 1.5  | 8.8                   | 1.5  |
|                          | 10 <sup>4</sup> | 10.0                 | 0.0  | 9.5                  | 1.0  | 9.5                  | 1.0  | 9.5                  | 1.0  | 9.0                   | 1.4  | 8.8                   | 1.3  |
| <i>M. circinelloides</i> | 10 <sup>7</sup> | 6.3                  | 2.3  | 5.3                  | 0.6  | 5.0                  | 1.0  | 4.0                  | 1.0  | 4.0                   | 1.0  | 4.0                   | 1.0  |
|                          | 10 <sup>6</sup> | 8.4                  | 2.3  | 7.9                  | 2.0  | 6.5                  | 1.9  | 6.5                  | 1.9  | 5.3                   | 1.9  | 5.0                   | 1.7  |
|                          | 10 <sup>5</sup> | 9.8                  | 0.5  | 9.8                  | 0.5  | 9.5                  | 0.6  | 9.3                  | 0.5  | 7.8                   | 1.7  | 7.3                   | 1.3  |
|                          | 10 <sup>4</sup> | 10.0                 | 0.0  | 9.8                  | 0.5  | 8.8                  | 1.3  | 8.8                  | 1.3  | 7.8                   | 1.0  | 7.5                   | 1.3  |

**Table S5:** Survival rates of larvae infected with mucormycetes and incubated at 37°C. Average survival was calculated out of 60 infected larvae, stev indicates standard deviation.

| samples                  | inoculum        | average survival 24h | stev | average survival 48h | stev | average survival 72h | stev | average survival 96h | stev | average survival 120h | stev | average survival 144h | stev |
|--------------------------|-----------------|----------------------|------|----------------------|------|----------------------|------|----------------------|------|-----------------------|------|-----------------------|------|
| IPS                      |                 | 10.0                 | 0.0  | 9.8                  | 0.4  | 9.8                  | 0.4  | 9.7                  | 0.5  | 9.7                   | 0.5  | 9.3                   | 0.5  |
| untouched                |                 | 10.0                 | 0.0  | 9.9                  | 0.4  | 9.7                  | 0.5  | 9.6                  | 0.5  | 9.6                   | 0.5  | 9.4                   | 0.5  |
| <i>R. microsporus</i>    | 10 <sup>7</sup> | 0.0                  | 0.0  | 0.0                  | 0.0  | 0.0                  | 0.0  | 0.0                  | 0.0  | 0.0                   | 0.0  | 0.0                   | 0.0  |
|                          | 10 <sup>6</sup> | 8.2                  | 2.6  | 0.0                  | 0.0  | 0.0                  | 0.0  | 0.0                  | 0.0  | 0.0                   | 0.0  | 0.0                   | 0.0  |
|                          | 10 <sup>5</sup> | 9.8                  | 0.4  | 2.7                  | 2.3  | 0.0                  | 0.0  | 0.0                  | 0.0  | 0.0                   | 0.0  | 0.0                   | 0.0  |
|                          | 10 <sup>4</sup> | 9.8                  | 0.5  | 5.0                  | 1.4  | 2.3                  | 2.6  | 0.0                  | 0.0  | 0.0                   | 0.0  | 0.0                   | 0.0  |
| <i>R. arrhizus</i>       | 10 <sup>7</sup> | 0.0                  | 0.0  | 0.0                  | 0.0  | 0.0                  | 0.0  | 0.0                  | 0.0  | 0.0                   | 0.0  | 0.0                   | 0.0  |
|                          | 10 <sup>6</sup> | 8.2                  | 2.6  | 0.1                  | 0.4  | 0.0                  | 0.0  | 0.0                  | 0.0  | 0.0                   | 0.0  | 0.0                   | 0.0  |
|                          | 10 <sup>5</sup> | 8.8                  | 1.8  | 3.7                  | 2.9  | 2.0                  | 3.1  | 1.8                  | 2.9  | 1.8                   | 2.9  | 1.8                   | 2.9  |
|                          | 10 <sup>4</sup> | 10.0                 | 0.0  | 9.8                  | 0.5  | 7.3                  | 2.2  | 2.0                  | 1.6  | 0.8                   | 1.0  | 0.5                   | 1.0  |
| <i>Rh. pusillus</i>      | 10 <sup>7</sup> | 9.5                  | 0.8  | 7.7                  | 2.3  | 5.0                  | 2.0  | 3.2                  | 2.0  | 2.8                   | 2.0  | 2.5                   | 2.1  |
|                          | 10 <sup>6</sup> | 10.0                 | 0.0  | 9.8                  | 0.5  | 6.8                  | 1.7  | 5.0                  | 2.2  | 4.8                   | 2.1  | 3.3                   | 1.5  |
|                          | 10 <sup>5</sup> | 9.0                  | 1.2  | 8.5                  | 1.7  | 7.5                  | 0.6  | 6.0                  | 1.8  | 5.8                   | 1.5  | 5.5                   | 1.3  |
|                          | 10 <sup>4</sup> | 9.8                  | 0.5  | 9.8                  | 0.5  | 9.3                  | 1.0  | 9.3                  | 1.0  | 8.5                   | 0.6  | 8.0                   | 0.8  |
| <i>L. corymbifera</i>    | 10 <sup>7</sup> | 6.0                  | 4.2  | 2.8                  | 2.2  | 0.0                  | 0.0  | 0.0                  | 0.0  | 0.0                   | 0.0  | 0.0                   | 0.0  |
|                          | 10 <sup>6</sup> | 10.0                 | 0.0  | 6.0                  | 2.6  | 1.5                  | 2.4  | 0.5                  | 1.0  | 0.5                   | 1.0  | 0.5                   | 1.0  |
|                          | 10 <sup>5</sup> | 10.0                 | 0.0  | 7.8                  | 2.6  | 2.5                  | 2.4  | 1.5                  | 1.3  | 1.3                   | 1.0  | 1.3                   | 1.0  |
|                          | 10 <sup>4</sup> | 10.0                 | 0.0  | 10.0                 | 0.0  | 8.3                  | 1.7  | 5.0                  | 2.2  | 4.8                   | 2.2  | 4.3                   | 2.2  |
| <i>L. ramosa</i>         | 10 <sup>7</sup> | 8.3                  | 1.7  | 8.3                  | 1.7  | 6.0                  | 2.4  | 3.3                  | 1.9  | 3.3                   | 1.9  | 3.3                   | 1.9  |
|                          | 10 <sup>6</sup> | 10.0                 | 0.0  | 8.0                  | 0.0  | 8.0                  | 0.0  | 6.5                  | 2.1  | 6.0                   | 1.4  | 5.0                   | 2.8  |
|                          | 10 <sup>5</sup> | 10.0                 | 0.0  | 8.5                  | 2.1  | 7.5                  | 0.7  | 3.5                  | 0.7  | 3.5                   | 0.7  | 3.5                   | 0.7  |
|                          | 10 <sup>4</sup> | 10.0                 | 0.0  | 9.0                  | 2.0  | 9.0                  | 2.0  | 6.8                  | 1.9  | 6.3                   | 1.7  | 6.0                   | 1.4  |
| <i>M. circinelloides</i> | 10 <sup>7</sup> | 8.5                  | 2.4  | 8.3                  | 2.4  | 8.0                  | 2.4  | 7.8                  | 2.6  | 7.3                   | 3.2  | 6.8                   | 2.8  |
|                          | 10 <sup>6</sup> | 10.0                 | 0.0  | 9.3                  | 1.2  | 9.3                  | 1.2  | 9.0                  | 1.3  | 8.7                   | 1.2  | 8.0                   | 0.9  |
|                          | 10 <sup>5</sup> | 10.0                 | 0.0  | 10.0                 | 0.0  | 10.0                 | 0.0  | 9.5                  | 0.6  | 9.5                   | 0.6  | 9.0                   | 0.0  |
|                          | 10 <sup>4</sup> | 10.0                 | 0.0  | 9.5                  | 0.6  | 9.3                  | 1.0  | 9.0                  | 1.4  | 8.8                   | 1.3  | 8.8                   | 1.3  |
